# Supplementary material
Source: publisher figshare collection journal article supplement (https://asha.figshare.com/articles/dataset/_/5596708)
Supplement: Supplementary file 1 [file 1]

**Supplemental Material S3.** Examples of treatment stimuli implemented in the current study.

| Target sounds                 | Examples of treatment stimuli           |      |      |      |      | Treated |
|-------------------------------|-----------------------------------------|------|------|------|------|---------|
| Consonants (C):<br>b, m, n, t | <i>Variation level 1</i><br>C1 V1 C1 V+ | bɒbi | mumi | nini | tɛti | Yes     |
|                               |                                         | bɒbu | mumu | ninu | tɛtu |         |
| Vowels (V):<br>i, u, ɔ, ɛ, æ  |                                         | bɒbɔ | mumɔ | ninɔ | tɛtɔ |         |
|                               |                                         | bɒbɛ | mumɛ | ninɛ | tɛtɛ |         |
|                               |                                         | bɒbæ | mumæ | ninæ | tɛtæ |         |
|                               |                                         |      |      |      |      |         |
|                               | <i>Variation level 2</i><br>C1 V1 C2 V+ | bæmi | muti | nɛbi | tɔni |         |
|                               |                                         | bæmu | mutu | nɛbu | tɔnu |         |
|                               |                                         | bæmɔ | mutɔ | nɛbɔ | tɔnɔ | Yes     |
|                               |                                         | bæmɛ | mutɛ | nɛbɛ | tɔnɛ |         |
|                               |                                         | bæmæ | mutæ | nɛbæ | tɔnæ |         |
|                               |                                         |      |      |      |      |         |
|                               | <i>Variation level 3</i><br>C1 V1 C+ V1 | bɛbɛ | mæbæ | nubu | tibi |         |
|                               |                                         | bɛmɛ | mæmæ | numu | timi |         |
|                               |                                         | bɛnɛ | mænæ | nunu | tini | No      |
|                               |                                         | bɛtɛ | mætæ | nutu | titi |         |
|                               | <i>Variation level 4</i><br>C1 V+ C2 V1 | bɪnɔ | mitɛ | nibi | timæ |         |
|                               |                                         | bunɔ | mutɛ | nubi | tumæ |         |
|                               |                                         | bɔnɔ | mɔtɛ | nɔbi | tɔmæ | No      |
|                               |                                         | bɛnɔ | mɛtɛ | nɛbi | tɛmæ |         |
|                               |                                         | bænɔ | mætɛ | næbi | tæmæ |         |
|                               |                                         |      |      |      |      |         |
|                               | <i>Variation level 5</i><br>C1 V+ C+ V+ | bɛtu | mænu | nuti | tɛbæ |         |
|                               |                                         | bɔmɛ | muni | nitɔ | tænɔ |         |
|                               |                                         | bæmi | mumɛ | nɔmɛ | tɔtæ | No      |
|                               |                                         | bɛtæ | mɔti | nɛnɛ | tibɛ |         |
|                               |                                         | bubɔ | mɛbɔ | nætu | tæmu |         |

*Note.* Treatment stimuli for the participant in this study were generated in series of CVCV nonwords. Phonetic variation increases hierarchically from Variation Level 1 (only the final vowel varies) to Variation Level 5 (both vowels and the second consonant vary). Only Variation Level 1 and 2 were treated in the 9-week treatment period. Plus (+) indicates variation of sounds across a series of nonwords.
