# Supplementary material
Source: publisher figshare collection journal article supplement (https://asha.figshare.com/articles/dataset/_/5596708)
Supplement: Supplementary file 2 [file 1]

## Supplemental Material S2. Analysis of the participant's phonetic repertoire.

| Consonants                 |     |     |     |     |     |     |     |     |     |     |     |     |     |     |     |     |     |     |     |      |      |     |     |     |     |     |
|----------------------------|-----|-----|-----|-----|-----|-----|-----|-----|-----|-----|-----|-----|-----|-----|-----|-----|-----|-----|-----|------|------|-----|-----|-----|-----|-----|
|                            | /p/ | /b/ | /t/ | /d/ | /k/ | /g/ | /m/ | /n/ | /ŋ/ | /f/ | /v/ | /θ/ | /ð/ | /s/ | /z/ | /ʃ/ | /ʒ/ | /h/ | /ʔ/ | /tʃ/ | /dʒ/ | /w/ | /l/ | /ɹ/ | /ɹ/ | /j/ |
| Frequency (%) <sup>a</sup> | 10  | 15  | 13  | 15  | 3   | 2   | 15  | 3   | 0   | 0.8 | 0   | 0   | 3   | 5   | 0.8 | 0.8 | 0   | 4   | 0.3 | 0.8  | 0    | 5   | 0   | 3   | 1   |     |
| Accuracy (%) <sup>a</sup>  | 58  | 76  | 61  | 57  | 0   | 0   | 79  | 75  | 0   | 0   | 0   | 0   | 0   | 0   | 0   | 67  | 0   | 44  | 100 | 67   | 0    | 82  | 0   | 0   | 40  |     |
| SML rating <sup>b</sup>    | 2   | 1   | 1   | 2   | 4   | 4   | 1   | 1   | 4   | 2   | 4   | 4   | 4   | 4   | 4   | 3   | 4   | 4   | 3   | 4    | 4    | 3   | 4   | 4   | 2   |     |

| Vowels and diphthongs      |     |     |     |     |     |     |     |     |     |     |     |      |      |      |      |      |      |       |      |      |      |  |  |  |  |
|----------------------------|-----|-----|-----|-----|-----|-----|-----|-----|-----|-----|-----|------|------|------|------|------|------|-------|------|------|------|--|--|--|--|
|                            | /i/ | /ɪ/ | /ɛ/ | /æ/ | /ə/ | /ʌ/ | /ɑ/ | /ʊ/ | /u/ | /ɔ/ | /ɒ/ | /əɪ/ | /əʊ/ | /aʊ/ | /iʊ/ | /ɪə/ | /aɪ/ | /a:ɪ/ | /ɔɪ/ | /ɜ:/ | /ə-/ |  |  |  |  |
| Frequency (%) <sup>a</sup> | 8   | 4   | 14  | 7   | 2   | 14  | 4   | 6   | 6   | 14  | 6   | 0    | 6    | 3    | 0.4  | 5    | 3    | 0     | 0    | 0.4  | 0.7  |  |  |  |  |
| Accuracy (%) <sup>a</sup>  | 91  | 64  | 82  | 90  | 60  | 87  | 90  | 94  | 94  | 90  | 100 | 0    | 63   | 71   | 0    | 43   | 75   | 0     | 0    | 0    | 0    |  |  |  |  |
| SML rating <sup>b</sup>    | 1   | 1   | 1   | 1   | 2   | 2   | 1   | 1   | 1   | 1   | 1   | 2    | 2    | 2    | 4    | 3    | 1    | 1     | 1    | 4    | 4    |  |  |  |  |

*Note.* SML = speech motor learning. Age-appropriate consonants (acquired before or by age 3 years) are indicated in bold (Arlt & Goodban, 1976; Dodd, Holm, Hua, & Crosbie, 2003; Prather, Hedrick, & Kern, 1975). Vowels are reported to be generally mastered by 3 years (Lowe, 1994).

<sup>a</sup>*Frequency of occurrence (%)* and *accuracy (%)* of sounds in words were obtained from a 15-min spontaneous speech sample and picture-naming task. This analysis was performed by the second author. Number of words (some were simply sounds in imitation of, for example, a car driving) was 243 and 35% was intelligible. *Accuracy*: Consonant average % accuracy: 55.2%; vowel and diphthong average % accuracy: 81.7%

<sup>b</sup>*SML rating* refers to the assigned rating of each sound after the three pretreatment sound stimulability assessments of sounds in isolation (see selection of three sound sets in text).

## References

- Arlt, P. B., & Goodban, M. T. (1976). A comparative study of articulation acquisition as based on a study of 240 normals, aged three to six. *Language, Speech, and Hearing Services in Schools*, 7, 173–180. <https://doi.org/10.1044/0161-1461.0703.173>
- Dodd, B., Holm, A., Hua, Z., & Crosbie, S. (2003). Phonological development: A normative study of British English-speaking children. *Clinical Linguistics & Phonetics*, 17(8), 617–643. <https://doi.org/10.1080/0269920031000111348>
- Lowe, R. J. (1994). *Phonology: Assessment and intervention applications in speech pathology*. Baltimore, MD: Williams & Wilkins.
- Prather, E., Hedrick, D., & Kern, C. (1975). Articulation development in children aged two to four years. *Journal of Speech and Hearing Disorders*, 40, 179–191. <https://doi.org/10.1044/jshd.4002.179>
